# Supplementary material for: Self-assembled nanoplatform-mediated co-delivery of brusatol to sensitize sorafenib for hepatocellular carcinoma treatment
Source: Royal Society of Chemistry journal article supplement (doi:10.1039/d5ra00108k), 2025-01-01
Supplement: d5ra00108k2.pdf [file d5ra00108k2.pdf]

## Supporting Information

*for*

# Self-assembling Nanoplatfrom Co-delivery of Brusatol to Sensitize Sorafenib for Hepatocellular Carcinoma Treatment

Fengrui Liu<sup>a,b†</sup>, Senlin Li<sup>a†</sup>, Chengcheng Huang<sup>a†</sup>, Zhenfei Bi<sup>a</sup>, Xiao Xiang<sup>a</sup>, Shuqi Zhang<sup>a</sup>, Ruihao Yang<sup>a\*</sup>, Lu Zheng<sup>a\*</sup>

<sup>a</sup>Department of Hepatobiliary Surgery, the Second Affiliated Hospital of Army Medical University, Chongqing 400038, P. R. China

<sup>b</sup>Key Laboratory of Tongliang District People's Hospital, Chongqing 402560, P. R. China

\*: Corresponding authors: [yangruihao@alumni.sjtu.edu.cn](mailto:yangruihao@alumni.sjtu.edu.cn) (R. Yang);

[zhenglu@tmmu.edu.cn](mailto:zhenglu@tmmu.edu.cn) (L. Zheng)

†: These authors contributed equally to this work.

Fengrui Liu  
[lfrtlqrmhospital@163.com](mailto:lfrtlqrmhospital@163.com)

Senlin Li  
[lisenlin@tmmu.edu.cn](mailto:lisenlin@tmmu.edu.cn)

Chengcheng Huang  
[13883278155@163.com](mailto:13883278155@163.com)

Shuqi Zhang  
[a15923676293@163.com](mailto:a15923676293@163.com)

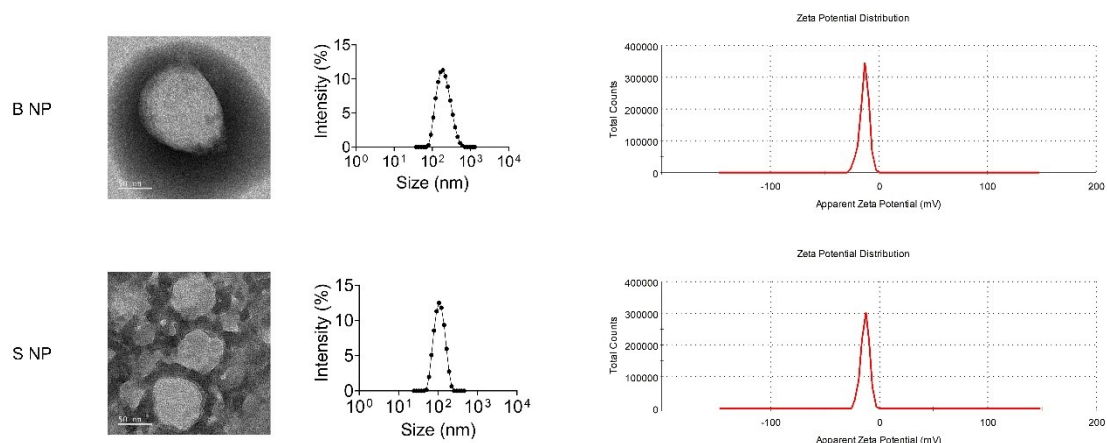

**Figure S1** Characterizations of Bru NP and Sor NP.

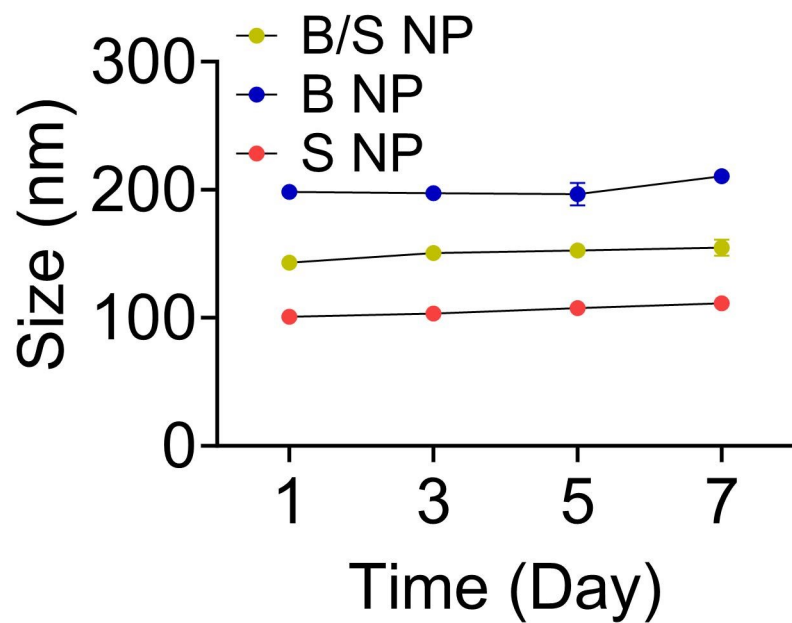

**Figure S2** The changes in particle size of B/S NP, B NP and S NP over a period of seven days.

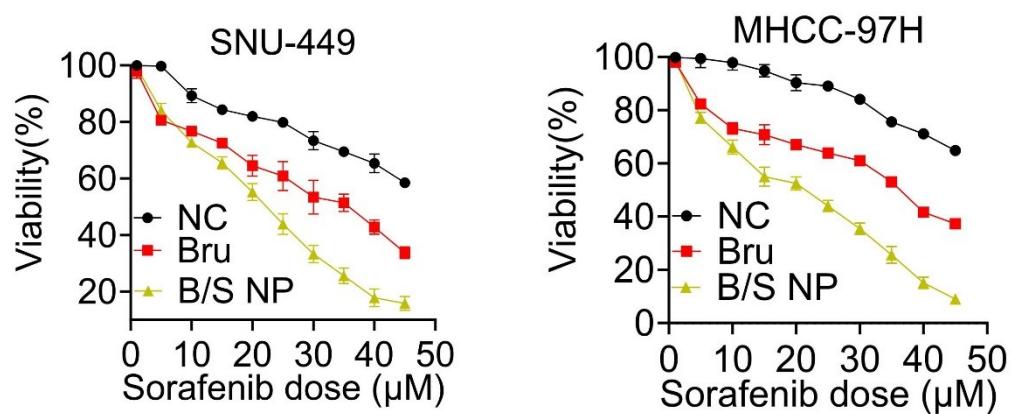

**Figure S3** Comparison of therapeutic effects between B/S NP and free B/S.

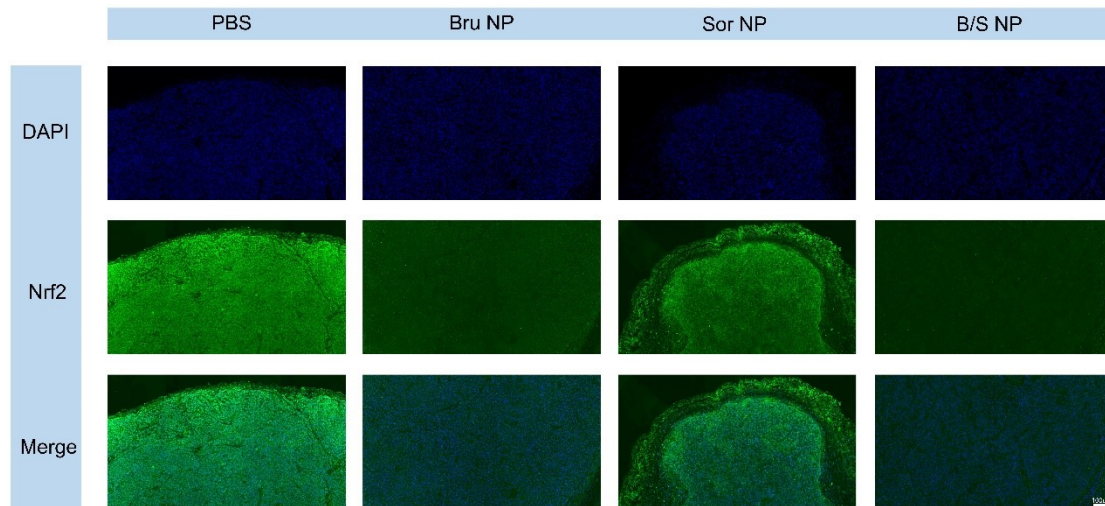

Figure S 4

**Figure S4** Immunofluorescence imaging exhibited nrf2 expression level in tumor-bearing mice treated with PBS, Bru NP, Sor NP, or B/S NP, respectively.
