# Supplementary figures and images for: Self-assembled nanoplatform-mediated co-delivery of brusatol to sensitize sorafenib for hepatocellular carcinoma treatment
Source: Royal Society of Chemistry journal article supplement (doi:10.1039/d5ra00108k), 2025-01-01

Uncropped image of Figure 3A

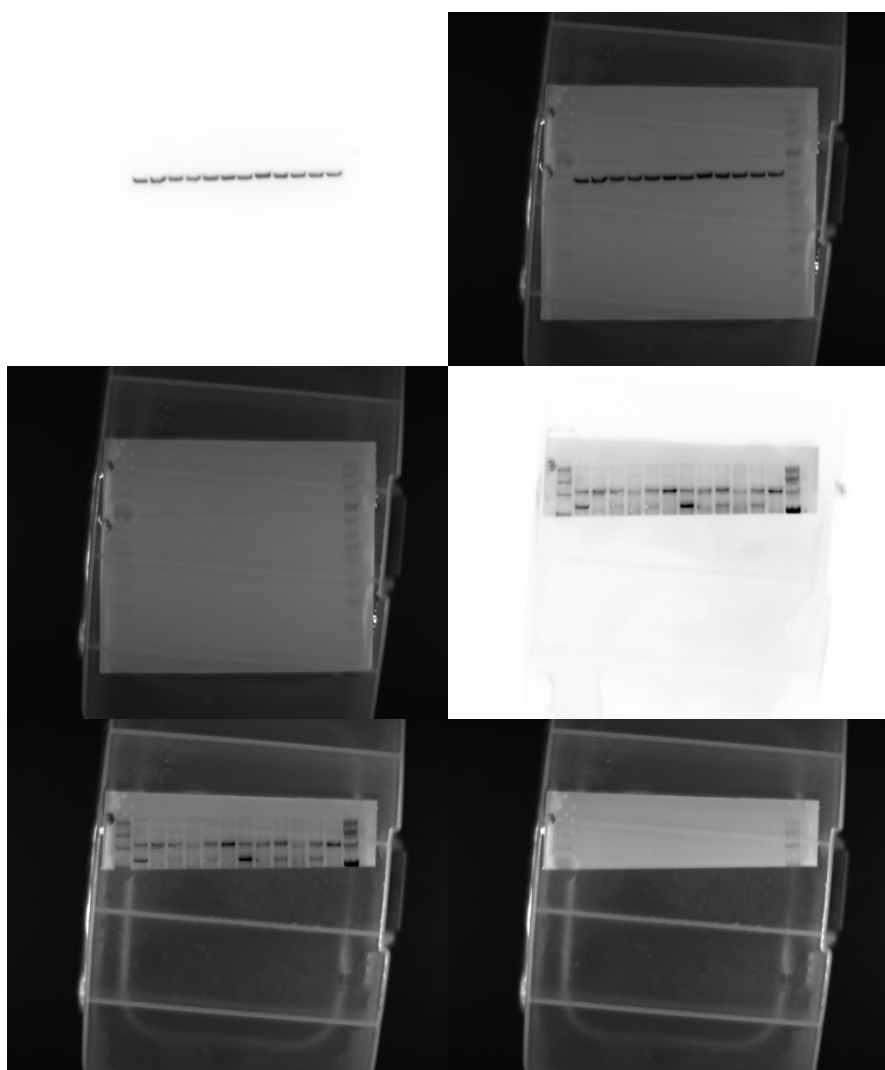

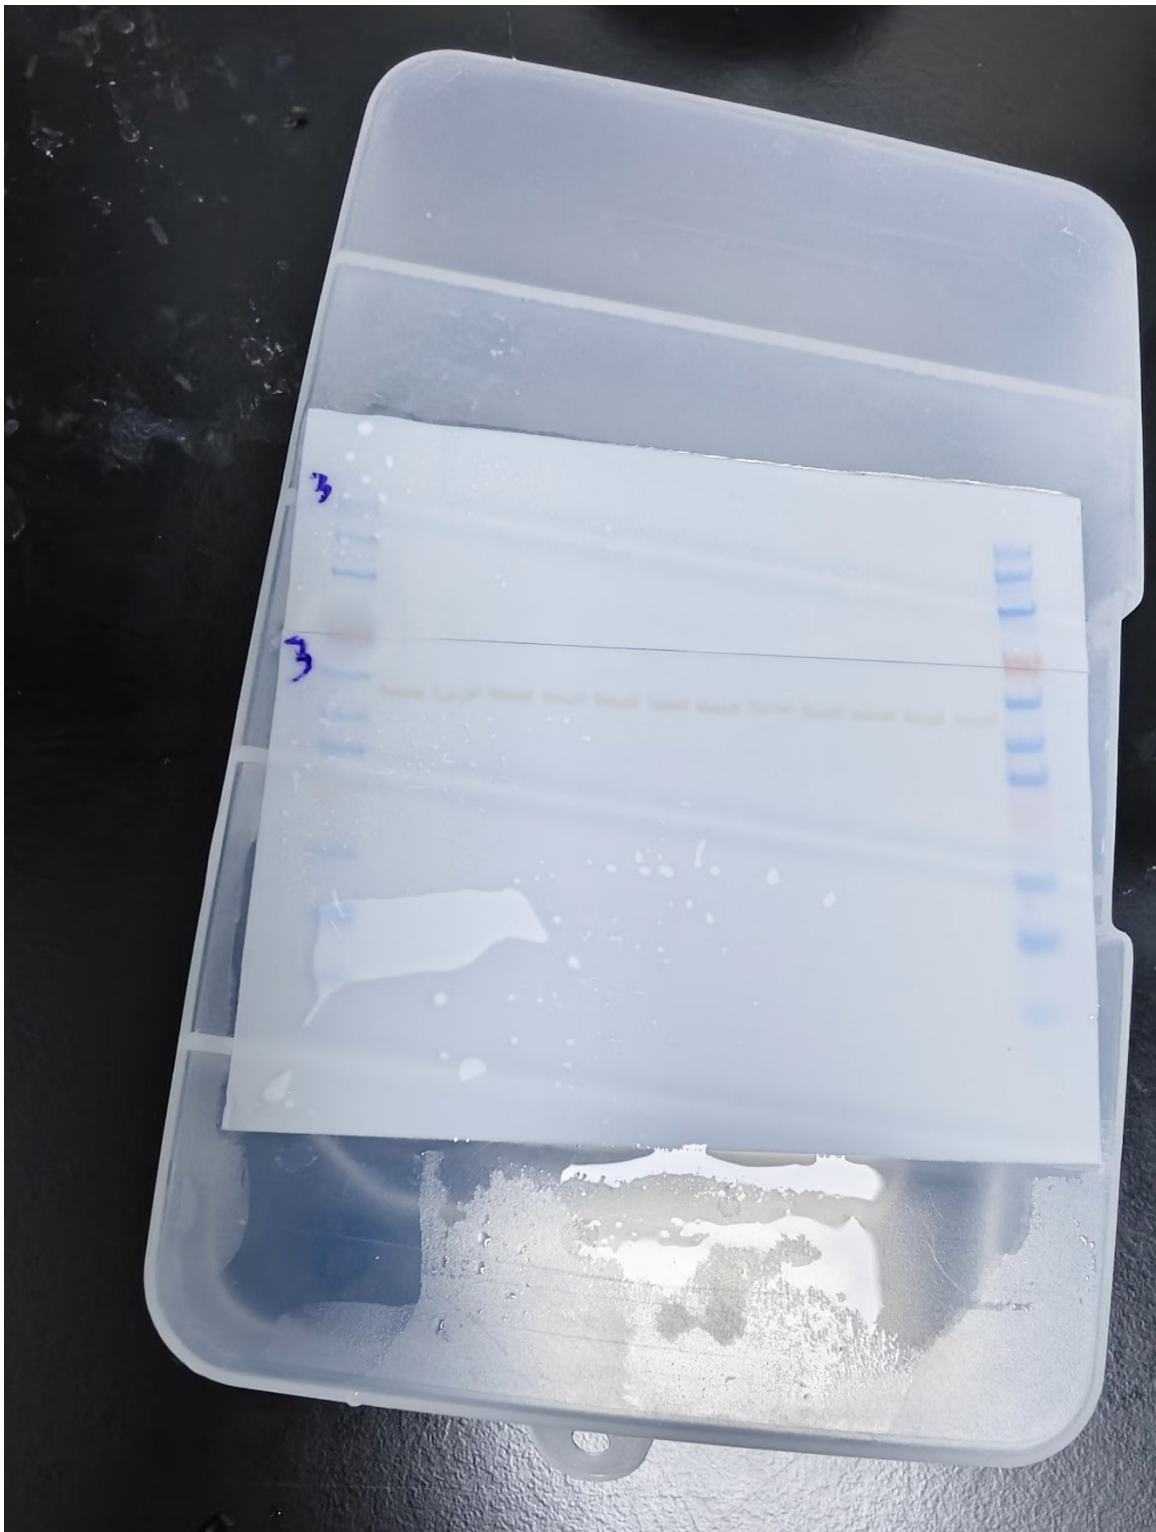

Uncropped image of Figure 3B

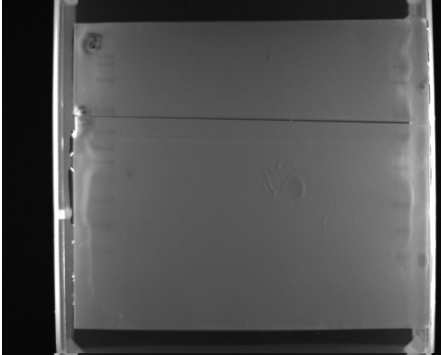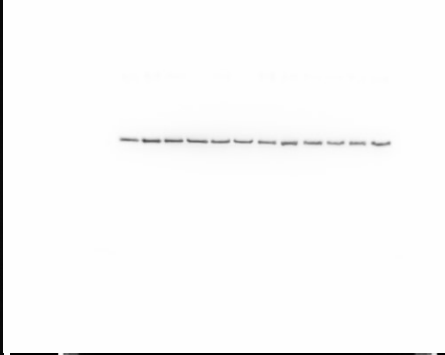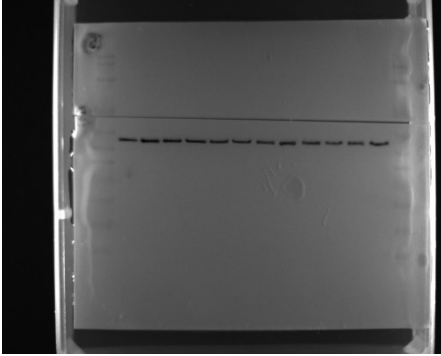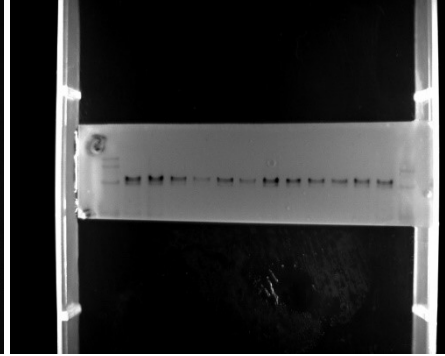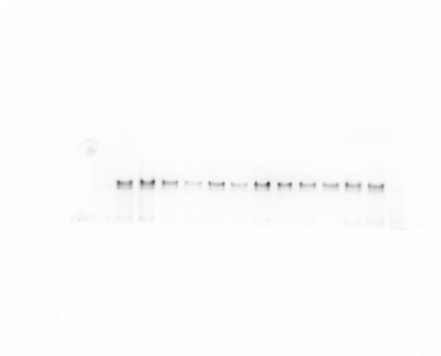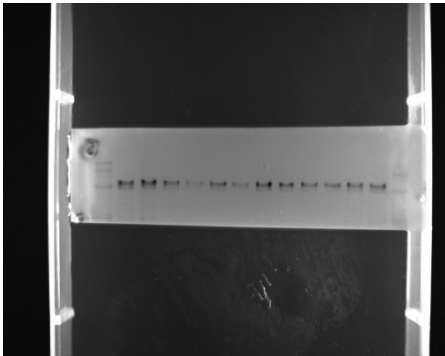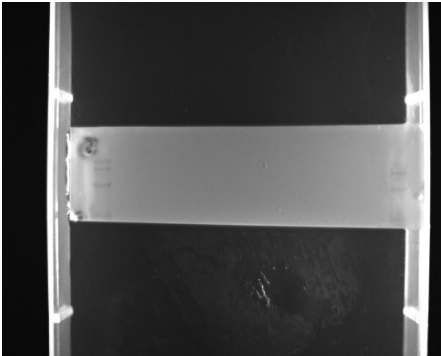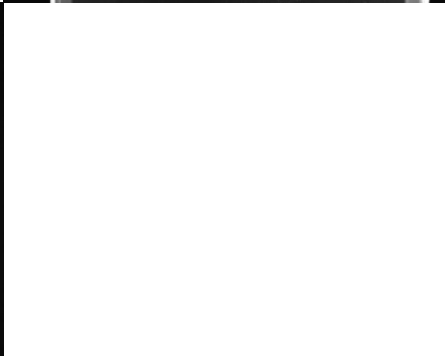

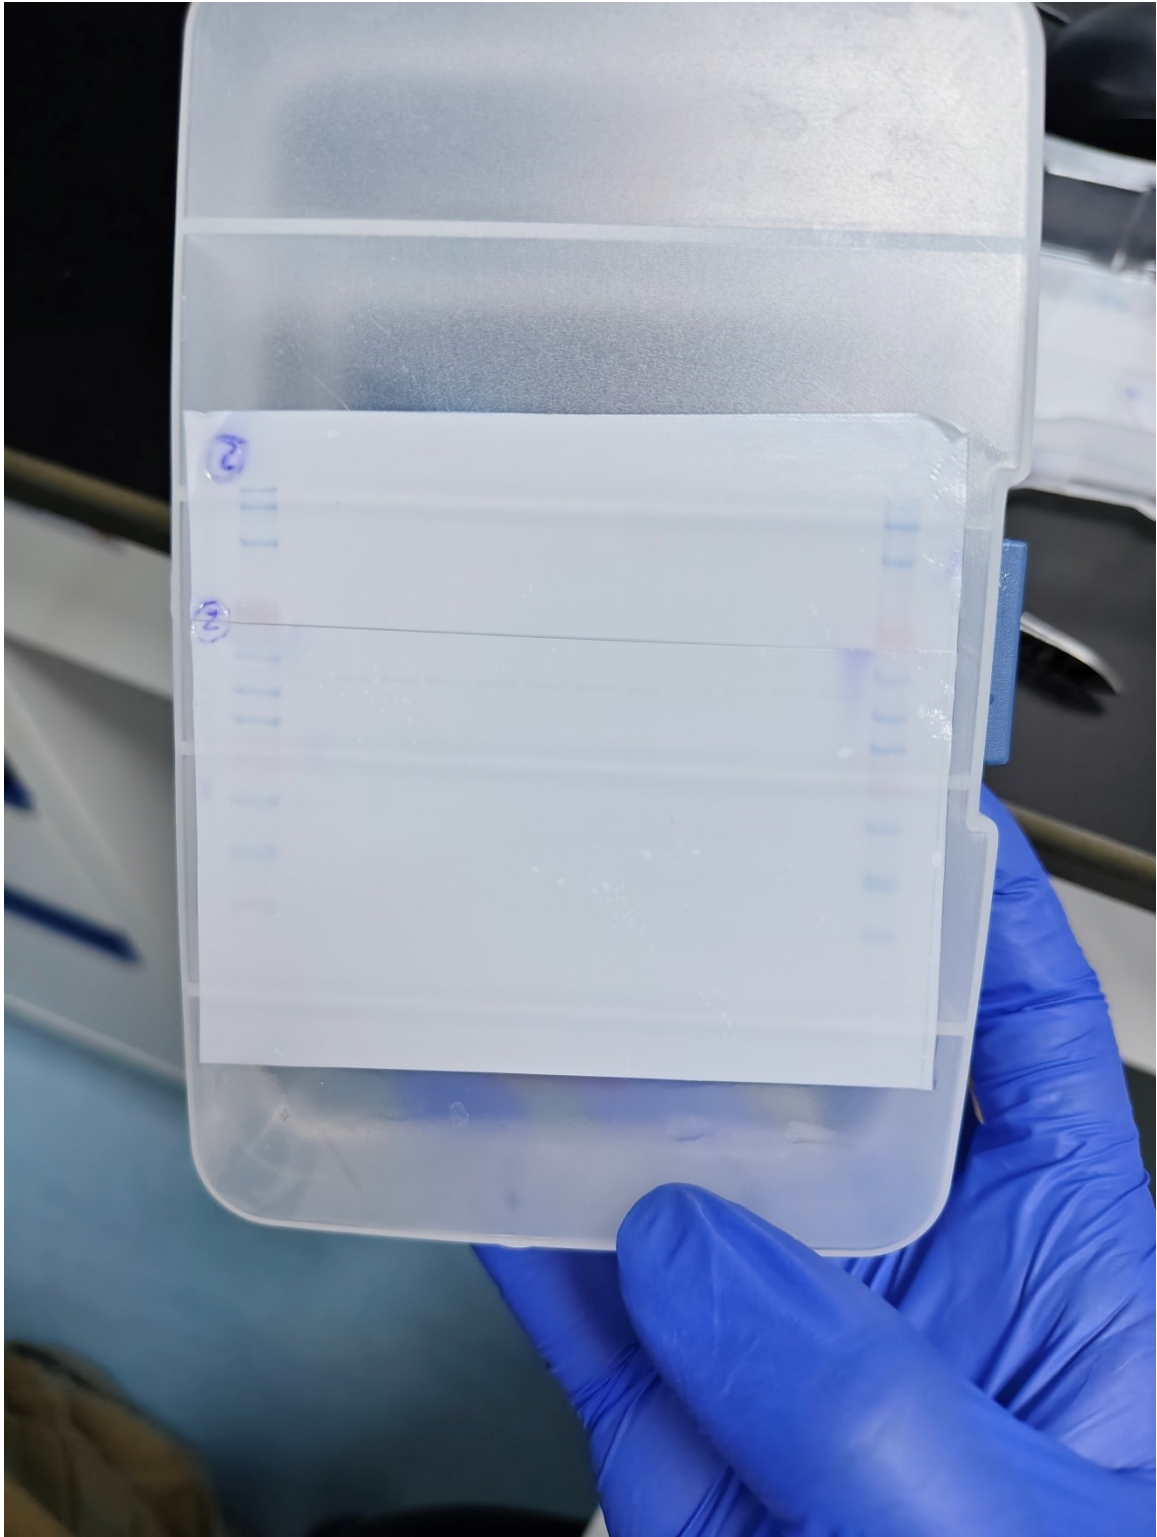

Uncropped image of Figure 4A

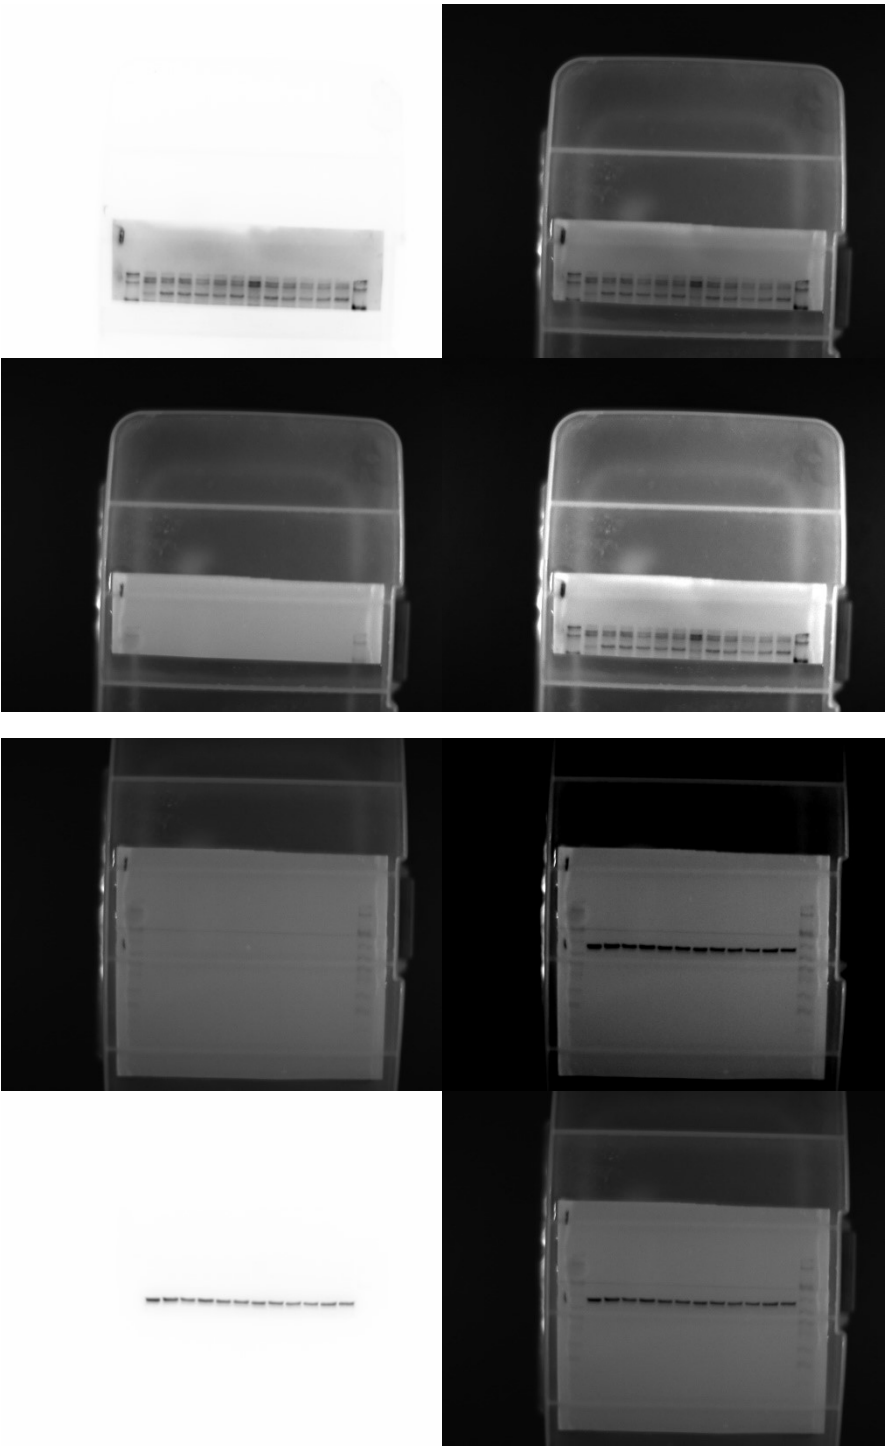



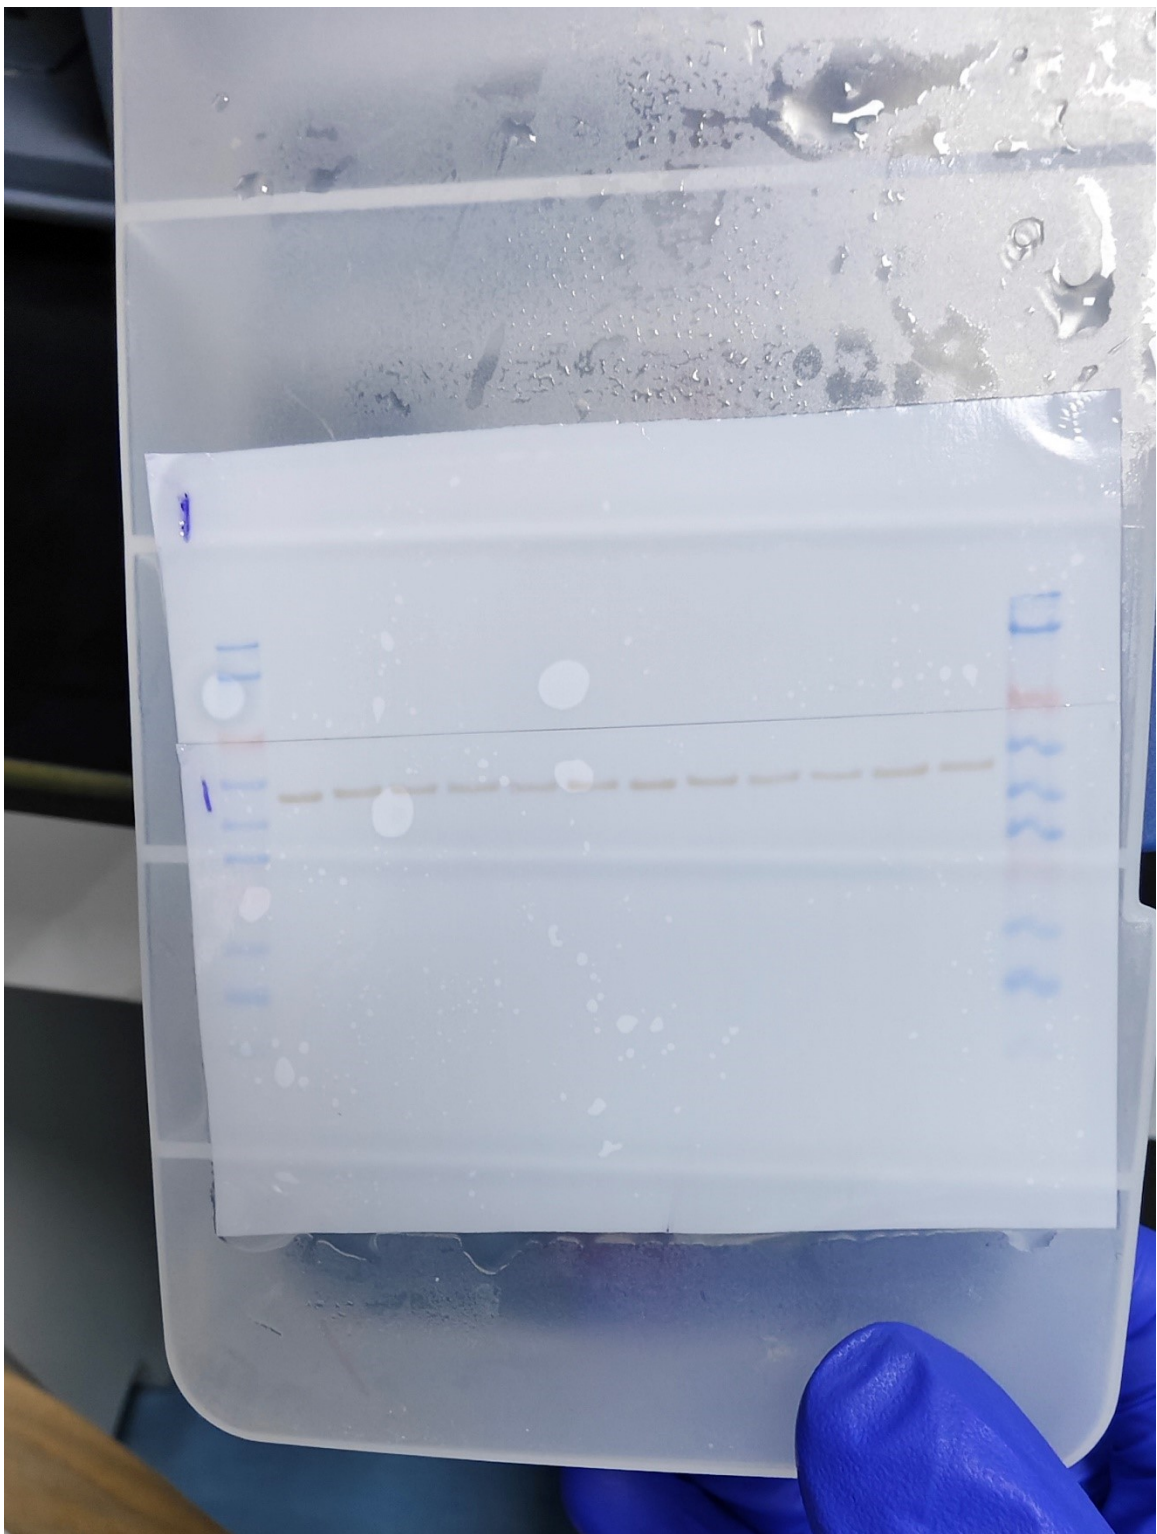

Supplement: d5ra00108k1.pdf [file d5ra00108k1.pdf]
